# Supplementary material for: Redox-responsive host–guest system using redox-active pillar[5]arene containing one benzoquinone unit
Source: Royal Society of Chemistry journal article supplement (doi:10.1039/c6cc02777f), 2016-01-01
Supplement: c6cc02777f1.pdf [file c6cc02777f1.pdf]

## **Electronic Supplementary Information (ESI)**

### Redox-responsive Host-guest System Using Redox-active Pillar[5]arene Containing One Benzoquinone Unit

*Tomoki Ogoshi\**, *Tomohiro Akutsu*, *Yasuo Shimada* and *Tada-aki Yamagishi*

#### **Table of Contents**

|                                                                                                                |       |
|----------------------------------------------------------------------------------------------------------------|-------|
| <b>Experimental section</b>                                                                                    | S2-S3 |
| <i>Fig. S1</i> Job plot for a mixture of <b>G</b> and quinone- <b>H2</b>                                       | S4    |
| <i>Fig. S2</i> <sup>1</sup> H NMR titration of <b>G</b> with quinone- <b>H2</b>                                | S5    |
| <i>Fig. S3</i> Variable temperature <sup>1</sup> H NMR spectra of a mixture of quinone- <b>H2</b> and <b>G</b> | S6    |
| <i>Fig. S4</i> Job plot for a mixture of <b>G</b> and 2OH- <b>H2</b>                                           | S7    |
| <i>Fig. S5</i> Van't Hoff plot of a mixture of <b>G</b> and 2OH- <b>H2</b>                                     | S8    |
| <i>Fig. S6</i> Variable temperature <sup>1</sup> H NMR spectra of a mixture of <b>G</b> and 2OH- <b>H2</b>     | S9    |
| <b>References</b>                                                                                              | S10   |

## **Experimental section**

**Materials.** All solvents and reagents were used as supplied. Per-ethylated pillar[5]arene (**H1**), **G**, quinone-**H2** and 2OH-**H2** were synthesized according to the previous papers.<sup>S1-S3</sup>

**Measurements.** The <sup>1</sup>H NMR spectra were recorded at 500 MHz and <sup>13</sup>C NMR spectra were recorded at 125 MHz with a JEOL-ECA500 spectrometer.

### **Determination of association constants.**

In quinone-**H2** ⊃ **G** complex in CDCl<sub>3</sub>, chemical exchange between uncomplexed and complexed species was fast on an NMR timescale. Thus, NMR titrations were done with solutions which had a constant concentration of **G** (2 mM) and varying concentrations of quinone-**H2**. By the non-linear curve-fitting method,<sup>S4</sup> the association constant *K* for the host-guest complex between quinone-**H2** and **G** was found to be  $K = 28 \pm 1.1 \text{ M}^{-1}$ .

In 2OH-**H2** ⊃ **G** complex in CDCl<sub>3</sub>, chemical exchange between complexed and uncomplexed species was slow on an NMR timescale. Thus, <sup>1</sup>H NMR spectra of mixtures of 2OH-**H2** and **G** in different ratio showed two sets of resonances for complexed and uncomplexed **G**. The association constant for 2OH-**H2** ⊃ **G** complex was  $(4.6 \pm 1.4) \times 10^2 \text{ M}^{-1}$ , calculated from integrations of complexed (Fig. 2b, pink peak a') and uncomplexed signals (Fig. 2b, pink peak b) of **G**.

**Determination of rate constants of the host-guest exchange.** The exchange rate constant (*k*) at a coalescence temperature was estimated by using the approximate expression<sup>S5,6</sup>:

$$\Delta G^\ddagger = 8.314T_c[22.96 + \log(T_c/\delta\nu)]$$

where  $\Delta G^\ddagger$  is the free energy of activation for the exchange,  $\delta\nu$  is the chemical shift difference between the proton signals from complexed and uncomplexed proton protons (Fig. S6, signals g and g'). The coalescence temperature  $T_c$  was estimated on the coalescence signal in these proton signals. The extrapolated value of *k*, which represent rate constant, at 25 °C was obtained from the Eyring equation:

$$k = k_B T / h \exp(-\Delta G^\ddagger / RT)$$

where  $k_B$  is the Boltzmann constant,  $T$  is the absolute temperature,  $h$  is Plank's constant,  $\Delta G^\ddagger$  is the free energy of activation, and  $R$  is the gas constant.

$$k = k_{in} + k_{out} \quad K = k_{in} / k_{out}$$

In 2OH-**H2**⊃**G** complex,  $k$ ,  $k_{in}$  and  $k_{out}$  (25 °C) were 190 s<sup>-1</sup>, 189 s<sup>-1</sup> and 1 s<sup>-1</sup>, respectively.

**Reversible redox reaction of H2⊃G complex by alternating addition of oxidant and reductant.** To the mixture of 2OH-**H2** (2.5 mM) and **G** (2.5 mM) in a mixture of CDCl<sub>3</sub> and CD<sub>3</sub>OD (CDCl<sub>3</sub> : CD<sub>3</sub>OD = 9:1), oxidant, tetrabutylammonium periodate (2 equiv. to 2OH-**H3**, 5.0 mM) was added. After 72 h, we checked the complexation by <sup>1</sup>H NMR (Fig 4b). To the mixture, reductant, tetrabutylammonium tetrahydroborate (2.5 mM) was added. After 72 h, we checked the complexation by <sup>1</sup>H NMR (Fig 4c). This redox-switching process was repeated by alternating addition of the oxidant and reductant.

## Job plot for a mixture of G and quinone-H2

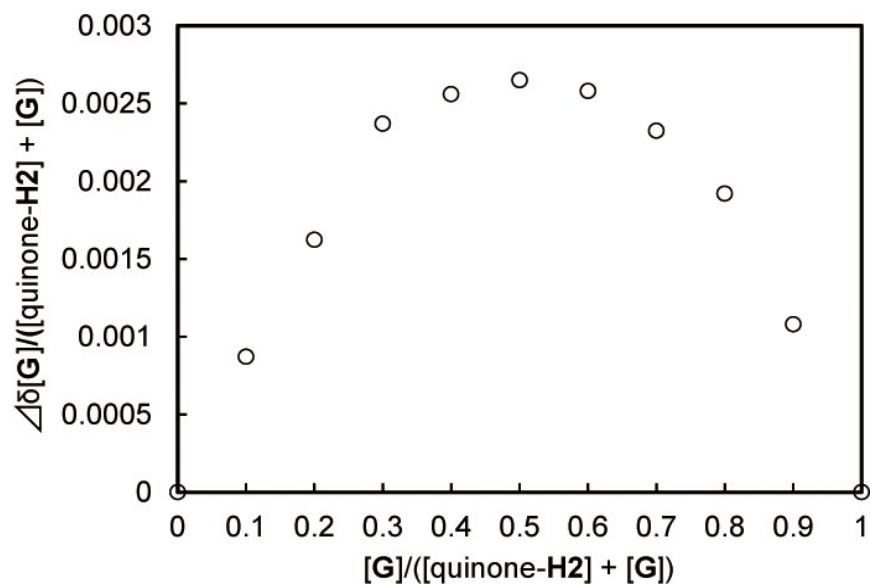

**Fig. S1** Job plot between **G** (guest) and quinone-**H2** (host) was collected by plotting the  $\Delta\delta$  in chemical shift of the triazole proton signal (Fig. 2d, yellow peak c). Concentration:  $[G] + [quinone-H2] = 1$  mM. The plot indicates a 1:1 binding between the host and guest.

## $^1\text{H}$ NMR titration of G with quinone-H2 in $\text{CDCl}_3$

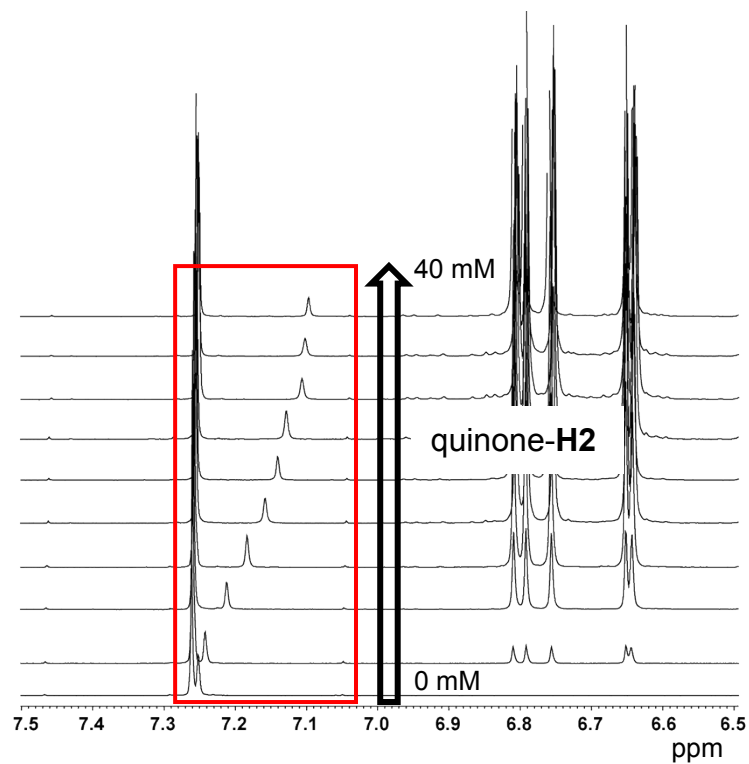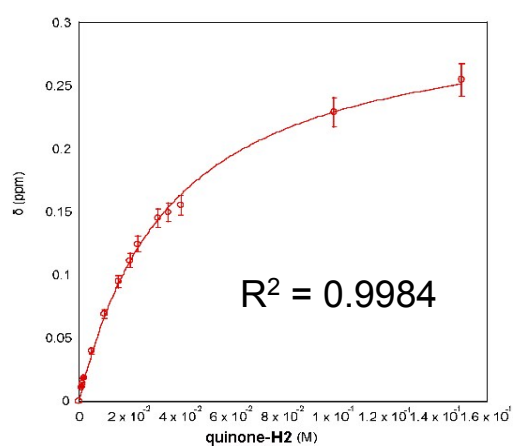

$$K_a = (28 \pm 1.1) \text{ M}^{-1} (25^\circ\text{C})$$

**Fig. S2**  $^1\text{H}$  NMR titration of G (Fig. 2d, proton peak c) with quinone-H2 in  $\text{CDCl}_3$  at 25  $^\circ\text{C}$ .

**Variable temperature  $^1\text{H}$  NMR spectra of a mixture of quinone-H2 and G in  $\text{CDCl}_3$**

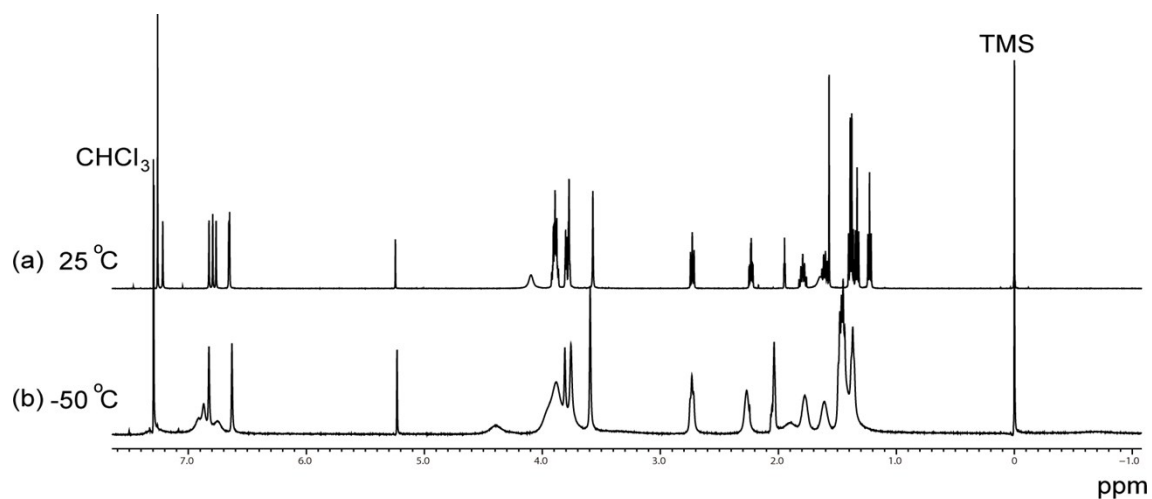

**Fig. S3** Variable temperature  $^1\text{H}$  NMR spectra (5 mM) of a mixture of quinone-H2 and G in  $\text{CDCl}_3$ . The averaged proton signals were observed at  $-50\text{ }^\circ\text{C}$ , while the signals were largely broadening, indicating that the exchange was still fast on the NMR timescale even at  $-50\text{ }^\circ\text{C}$ .

### Job plot for a mixture of G and 2OH-H2

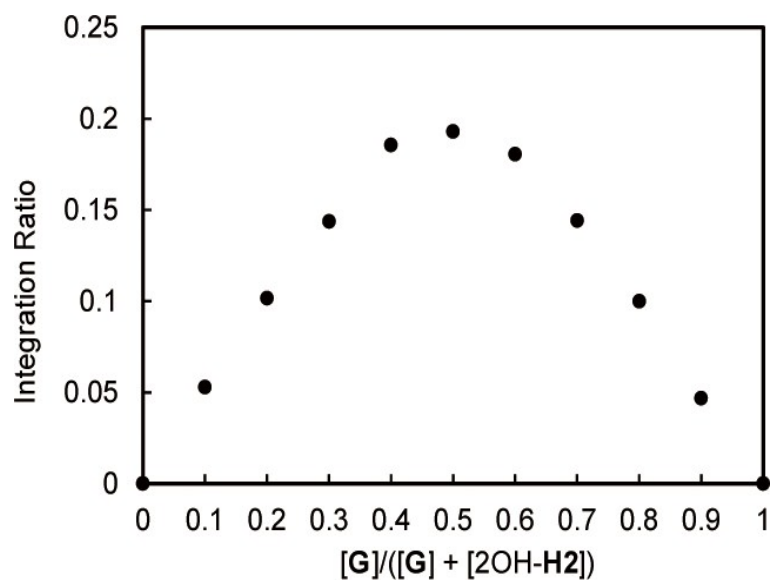

**Fig. S4** Job plot between **G** (guest) and **2OH-H2** (host). The job plot was conducted by varying the mole fractions of the guest and host. Integration ratios between uncomplexed and complexed proton signals (Fig. 2b, pink peaks b and a') were utilized. Concentration:  $[G] + [2OH-H2] = 1$  mM. The plot indicates a 1:1 binding between the host and guest.

### Van't Hoff plot of a mixture of G and 2OH-H2 in CDCl<sub>3</sub>

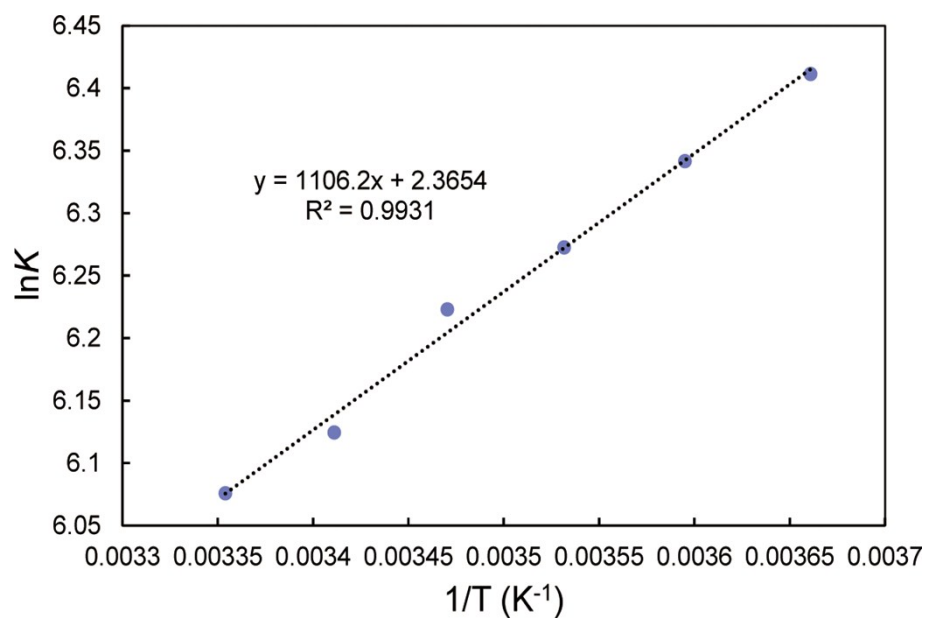

**Fig. S5** van't Hoff plots for a mixture of **G** and **2OH-H2**. From the van't Hoff plots,  $\Delta H$ ,  $\Delta S$  and  $\Delta G_{298}$  were calculated to be  $-9.20 \text{ kJmol}^{-1}$ ,  $19.7 \text{ JK}^{-1}\text{mol}^{-1}$ , and  $-14.6 \text{ kJmol}^{-1}$ , respectively.



**Variable temperature  $^1\text{H}$  NMR spectra of a mixture of G and 2OH-H2 in  $\text{CDCl}_3$**

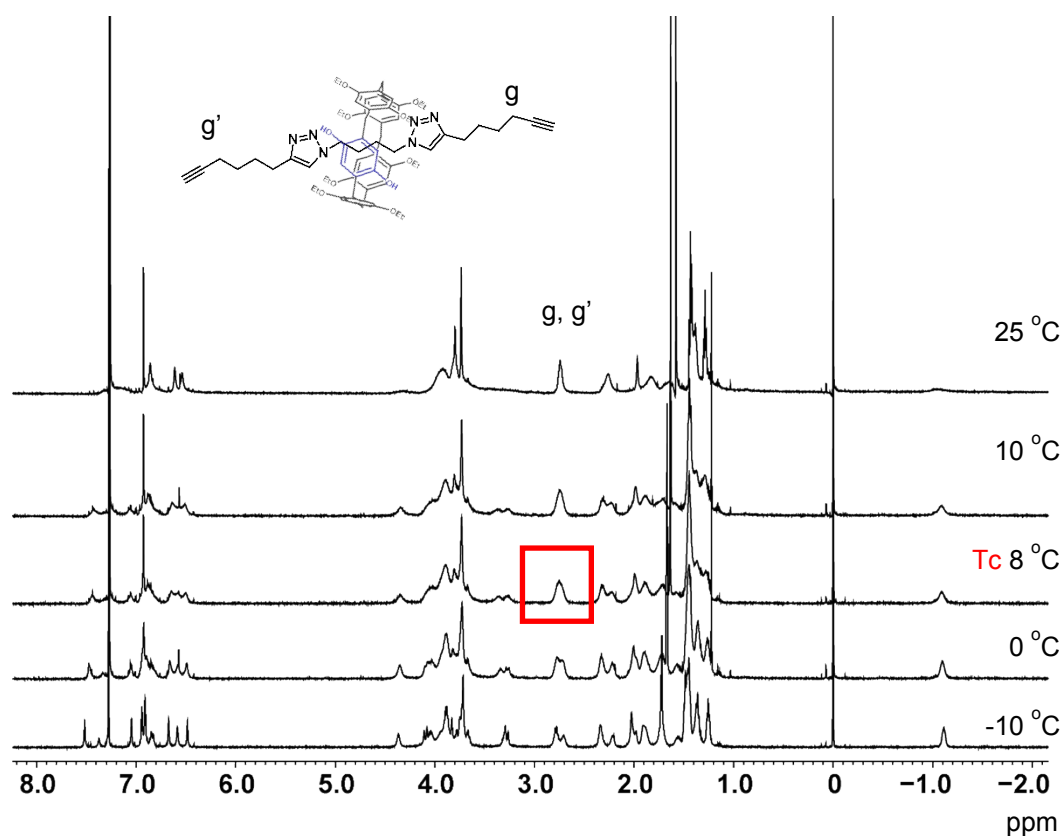

**Fig. S6** Variable-temperature  $^1\text{H}$  NMR spectra ( $\text{CDCl}_3$ ) of a mixture of G and 2OH-H2 in  $\text{CDCl}_3$ . The coalescence of the sets of the signals of from G was observed at 8 °C. From the coalescence temperature ( $T_c = 8\text{ °C}$ ), the rate constant ( $k$ ) at 298 K was calculated to be  $1.9 \times 10^2\text{ s}^{-1}$ .

## References

- S1) T. Ogoshi, K. Kitajima, T. Aoki, S. Fujinami and T. Yamagishi, *J. Org. Chem.*, 2011, **75**, 3268.
- S2) T. Ogoshi, D. Yamafuji, D. Kotera, T. Aoki, S. Fujinami and T. Yamagishi, *J. Org. Chem.*, 2012, **77**, 11146.
- S3) T. Ogoshi, R. Iizuka, D. Kotera and T. Yamagishi, *Org. Lett.*, 2015, **17**, 350.
- S4) P. Thordarson, *Chem. Soc. Rev.*, 2011, **40**, 1305.
- S5) I. O. Sutherland, *Annu. Rep. NMR Spectrosc.*, 1971, **4**, 71.
- S6) J. Sandstorm, In *Dynamic NMR Spectroscopy*; Academic Press: London, New York, 1982; pp 93-123.
